# Supplementary material for: Large oncosomes contain distinct protein cargo and represent a separate functional class of tumor-derived extracellular vesicles
Source: PubMed Central journal article supplement (PMC4484459; doi:10.18632/oncotarget.3598), 2015-03-14
Supplement: oncotarget-06-11327-s001.pdf [file oncotarget-06-11327-s001.pdf]

## Large oncosomes contain distinct protein cargo and represent a separate functional class of tumor-derived extracellular vesicles

### Supplementary Material

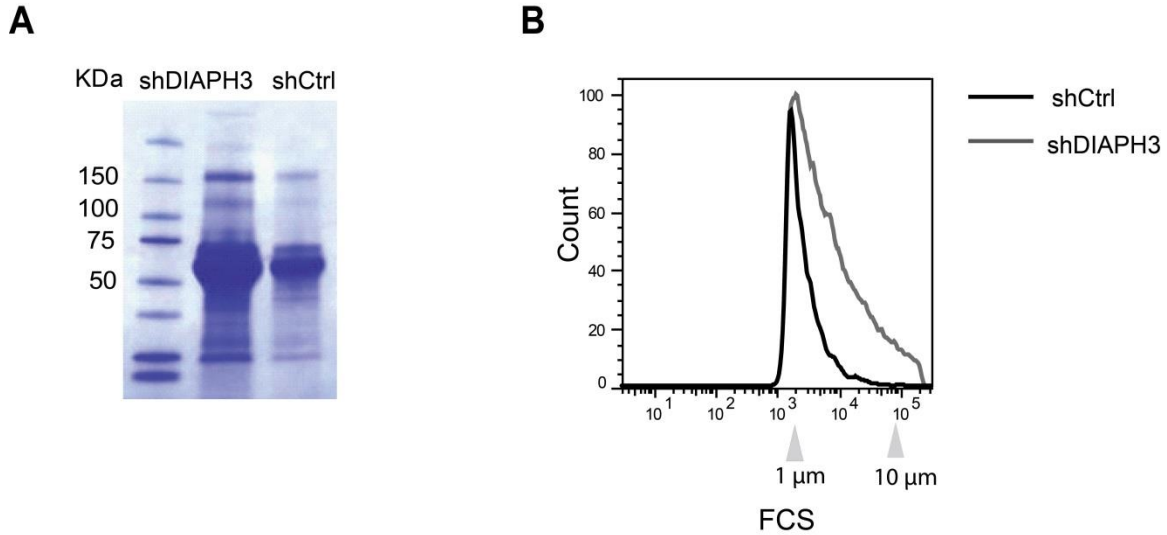

**Figure S1:** (A) Protein lysates from large EVs, isolated from the growth medium of DIAPH3-silenced or unsilenced control DU145 cells, were resolved by SDS-PAGE and stained with Coomassie Blue. Notice protein abundance is higher in EVs from DIAPH3-silenced cells. (B) Histogram of large EVs derived from DU145 cells stably transfected with either control or DIAPH3 shRNAs, showing increased EV shedding, compatible with large oncosomes, from the latter.

| A. List of proteins enriched in large EVs. |           |                          |         | B. List of proteins enriched in nano-sized EVs. |         |                          |       |
|--------------------------------------------|-----------|--------------------------|---------|-------------------------------------------------|---------|--------------------------|-------|
| Protein ID                                 | Symbol    | Large EVs/nano-sized EVs | FDR     | Protein ID                                      | Symbol  | Large EVs/nano-sized EVs | FDR   |
| P12236                                     | SLC25A6   | 87.575                   | < 0.001 | G8JLH6                                          | CD9     | 10.133                   | 0.01  |
| J3KPX7                                     | PHB2      | 73.812                   | < 0.001 | A6NMH8                                          | CD81    | 9.484                    | 0.003 |
| P06576                                     | ATP5B     | 61.432                   | < 0.001 | P11047                                          | LAMC1   | 8.821                    | 0.01  |
| Q00325                                     | SLC25A3   | 43.373                   | < 0.001 | O94985                                          | CLSTN1  | 8.374                    | 0.003 |
| P21796                                     | VDAC1     | 41.622                   | < 0.001 | P10253                                          | P10253  | 7.527                    | 0.013 |
| P00505                                     | GOT2      | 29.161                   | < 0.001 | Q14118                                          | DAG1    | 6.995                    | 0.016 |
| Q9UJZ1                                     | STOML2    | 27.436                   | < 0.001 | P01137                                          | TGFB1   | 6.973                    | 0.016 |
| P40926                                     | MDH2      | 27.318                   | < 0.001 | P11166                                          | SLC2A1  | 6.867                    | 0.016 |
| P38646                                     | HSPA9     | 20.08                    | < 0.001 | Q15758                                          | SLC1A5  | 5.523                    | 0.014 |
| P45880                                     | VDAC2     | 16.884                   | < 0.001 | O75787                                          | ATP6AP2 | 5.523                    | 0.009 |
| P05141                                     | SLC25A5   | 15.667                   | 0.001   | P10909-2                                        | CLU     | 5.377                    | 0.009 |
| P02751-15                                  | FN1       | 10.702                   | 0.003   | P08572                                          | COL4A2  | 5.353                    | 0.024 |
| P34897                                     | SHMT2     | 9.967                    | 0.003   | P62879                                          | GNB2    | 5.346                    | 0.011 |
| P16104                                     | H2AFX     | 9.772                    | 0.011   | P26006                                          | ITGA3   | 5.326                    | 0.012 |
| P10809                                     | HSPD1     | 8.491                    | 0.003   | J3KN08                                          | MATN2   | 5.215                    | 0.024 |
| Q13011                                     | ECH1      | 8.138                    | 0.008   | P19021-5                                        | PAM     | 5.107                    | 0.025 |
| P30048                                     | PRDX3     | 7.905                    | 0.008   | P27105                                          | STOM    | 5.047                    | 0.025 |
| Q02978                                     | SLC25A11  | 7.786                    | 0.008   | O00468                                          | AGRN    | 4.904                    | 0.05  |
| P52272                                     | HNRNPM    | 6.915                    | 0.01    | P06756                                          | ITGAV   | 4.748                    | 0.026 |
| B4DR52                                     | HIST2H2BF | 6.262                    | 0.004   | Q08431                                          | MFGE8   | 4.693                    | 0.029 |
| Q9H3N1                                     | TMX1      | 5.466                    | 0.01    | P18065                                          | IGFBP2  | 4.692                    | 0.012 |
| F8VTL3                                     | MYH10     | 5.25                     | 0.018   | P35052                                          | GPC1    | 4.626                    | 0.029 |
| F5H7K4                                     | NCEH1     | 5.208                    | 0.01    | Q13641                                          | TPBG    | 4.588                    | 0.03  |
| P30084                                     | ECHS1     | 4.924                    | 0.01    | P31431                                          | SDC4    | 4.55                     | 0.032 |
| Q969H8                                     | C19orf10  | 4.899                    | 0.021   | P16070                                          | CD44    | 4.465                    | 0.046 |
| P51571                                     | SSR4      | 4.836                    | 0.021   | P05362                                          | ICAM1   | 4.449                    | 0.034 |
| P23284                                     | PPIB      | 4.683                    | 0.021   | Q9Y4K0                                          | LOXL2   | 4.354                    | 0.004 |
| P06744-2                                   | GPI       | 4.677                    | 0.018   | P62873                                          | GNB1    | 4.26                     | 0.038 |
| Q15149                                     | PLEC      | 4.613                    | 0.024   | I3NI00                                          | BSG     | 4.249                    | 0.001 |
| P14314                                     | PRKCSH    | 4.604                    | 0.005   | O00159                                          | MYO1C   | 4.205                    | 0.04  |
| P20618                                     | PSMB1     | 4.446                    | 0.024   | B7Z5Z2                                          | RRAS2   | 4.198                    | 0.041 |
| Q96AG4                                     | LRRC59    | 4.409                    | 0.025   | J3KNY4                                          | CTSA    | 4.151                    | 0.003 |
| P17174                                     | GOT1      | 4.171                    | 0.032   | P07996                                          | THBS1   | 4.123                    | 0.018 |
| Q00839                                     | HNRNPU    | 4.012                    | 0.04    | Q9NS15                                          | LTBP3   | 4.068                    | 0.03  |
| P04843                                     | RPN1      | 4.007                    | 0.033   | Q92820                                          | GGH     | 4.043                    | 0.044 |
| P05783                                     | CK18      | 3.977                    | 0.003   | P00749                                          | PLAU    | 3.955                    | 0.047 |
| P84103                                     | SRSF3     | 3.94                     | 0.013   | O43854                                          | EDIL3   | 3.886                    | 0.002 |
| P27797                                     | CALR      | 3.896                    | 0.031   | P21589                                          | NT5E    | 3.87                     | 0.048 |
| P30101                                     | PDIA3     | 3.89                     | 0.038   | P05067                                          | APP     | 3.853                    | 0.002 |
| P62805                                     | HIST1H4A  | 3.865                    | 0.014   | P16035                                          | TIMP2   | 3.508                    | 0.023 |
| P06748                                     | P06748    | 3.839                    | 0.038   | Q9UBV8                                          | PEF1    | 3.354                    | 0.01  |
| P28074                                     | PSMB5     | 3.718                    | 0.03    | P07339                                          | CTSD    | 3.12                     | 0.037 |
| P07237                                     | P4HB      | 3.708                    | 0.049   | F5H3A1                                          | ATP1A1  | 3.106                    | 0.026 |
| P13667                                     | PDIA4     | 3.444                    | 0.046   | G8JLA8                                          | TGFBI   | 3.008                    | 0.045 |
| P49720                                     | PSMB3     | 3.43                     | 0.041   |                                                 |         |                          |       |
| P42704                                     | LRPPRC    | 3.414                    | 0.048   |                                                 |         |                          |       |
| P11021                                     | HSPA5     | 3.359                    | 0.014   |                                                 |         |                          |       |
| P30040                                     | ERP29     | 3.259                    | 0.034   |                                                 |         |                          |       |
| P35579                                     | MYH9      | 3.256                    | 0.01    |                                                 |         |                          |       |
| F5H098                                     | MDH1      | 3.217                    | 0.006   |                                                 |         |                          |       |
| E7EPA7                                     | TKT       | 2.963                    | 0.033   |                                                 |         |                          |       |
| P07195                                     | LDHB      | 2.851                    | 0.019   |                                                 |         |                          |       |
| P04406                                     | GAPDH     | 2.777                    | 0.017   |                                                 |         |                          |       |
| B5MDF5                                     | RAN       | 2.776                    | 0.023   |                                                 |         |                          |       |
| Q15084-2                                   | PDIA6     | 2.528                    | 0.041   |                                                 |         |                          |       |
| P46782                                     | RPS5      | 2.362                    | 0.023   |                                                 |         |                          |       |
| P07910                                     | HNRNPC    | 2.006                    | 0.027   |                                                 |         |                          |       |

**Figure S2:** Ratio of significant differentially expressed protein (DEPs) in large and nano-sized EVs (A) and vice-versa (B). FDR <0.01.

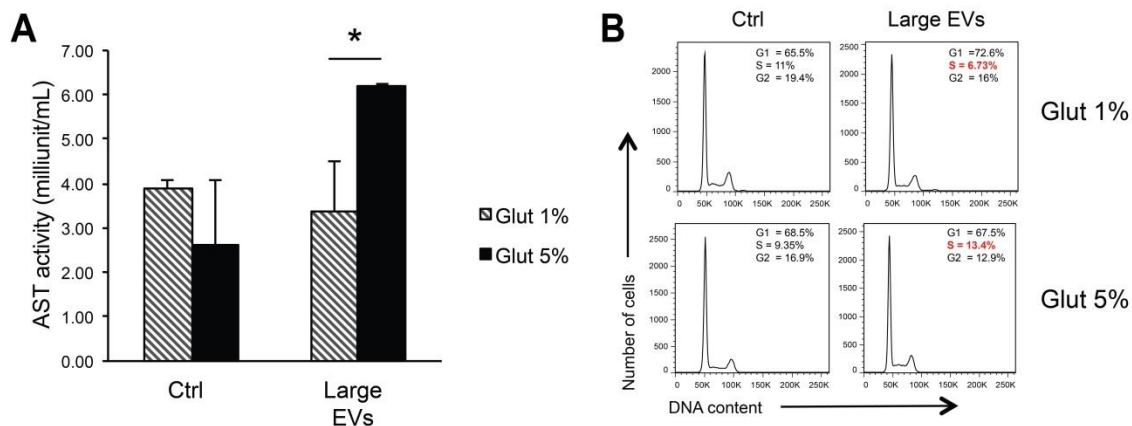

**Figure S3:** (A) The results from 2 experiments in DU145 cells treated with large oncosomes or vehicle are displayed as AST enzymatic activity (milliunit/mL), in cells cultured in 5% or 1% glutamine to highlight the enzymatic activity dynamically ( $p=0.023$ ). (B) Cell-cycle analysis of DU145 cells treated with large oncosomes or vehicle in presence of 1% or 5% glutamine for 24 hours. After treatment, the cells were incubated with propidium iodide for DNA content-based evaluation of cell-cycle phase distribution. The percentage of cells in S-phase was increased by treatment with large oncosomes in 5% (13.4%) in comparison with 1% glutamine (6.73%). See also Fig 4.

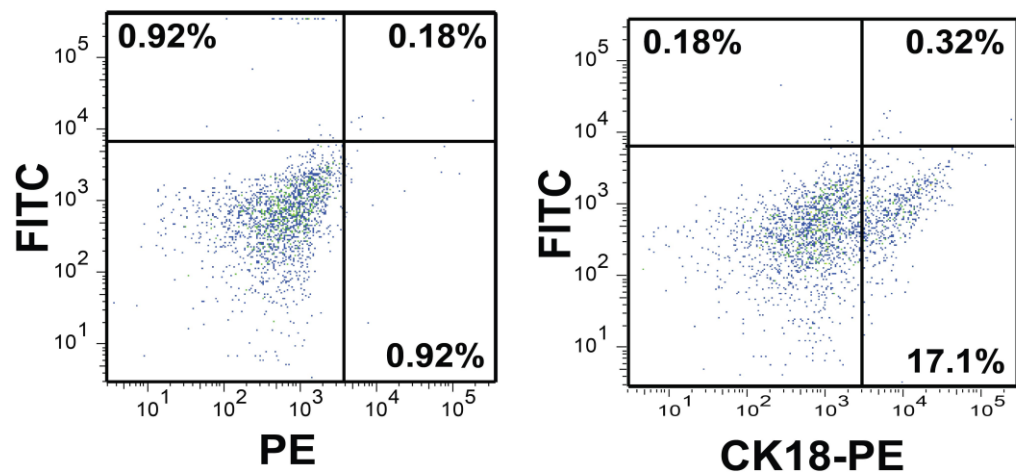

**Figure S4:** DIAPH3-silenced DU145 cell-derived large EVs unstained (left panel), and stained with CK18 (right panel) were analyzed by FACS.
